# Supplementary material for: Microbial metabolites in chronic heart failure and its common comorbidities
Source: PubMed Central journal article supplement (PMC10245034; doi:10.15252/emmm.202216928), 2023-05-08
Supplement: EMMM-15-e16928-s007.pdf [file EMMM-15-e16928-s007.pdf]

## Expanded View Figures

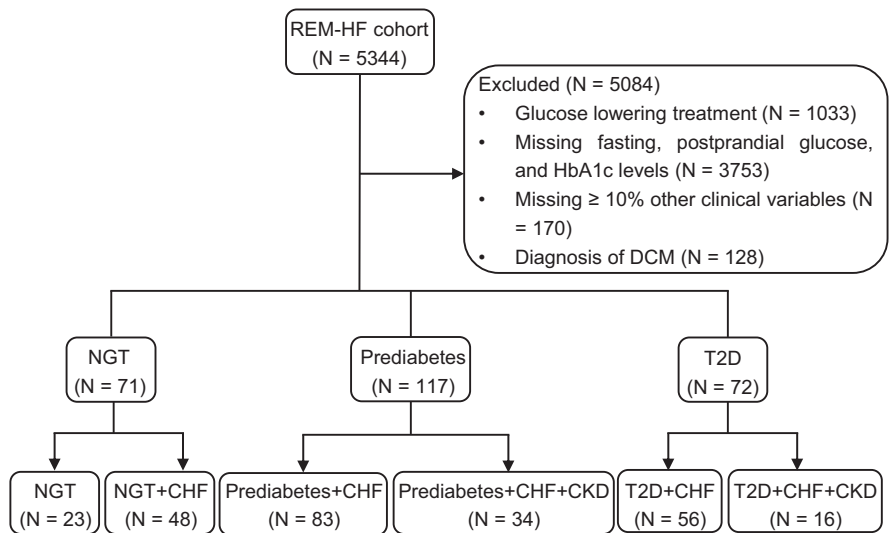

**Figure EV1. CONSORT diagram for REM-HF cohort.**

CHF, chronic heart failure; CKD, chronic kidney disease; DCM, Dilated cardiomyopathy; NGT, normal glucose tolerance; T2D, type 2 diabetes.

**Figure EV2. Absolute plasma levels of all 151 microbially associated metabolites in REM-HF cohort.**

The central band in each box represents the median, the top, and bottom of the box the 25<sup>th</sup> and 75<sup>th</sup> percentiles, and the whiskers 1.5 times the interquartile range ( $n = 260$ ; biological replicates).

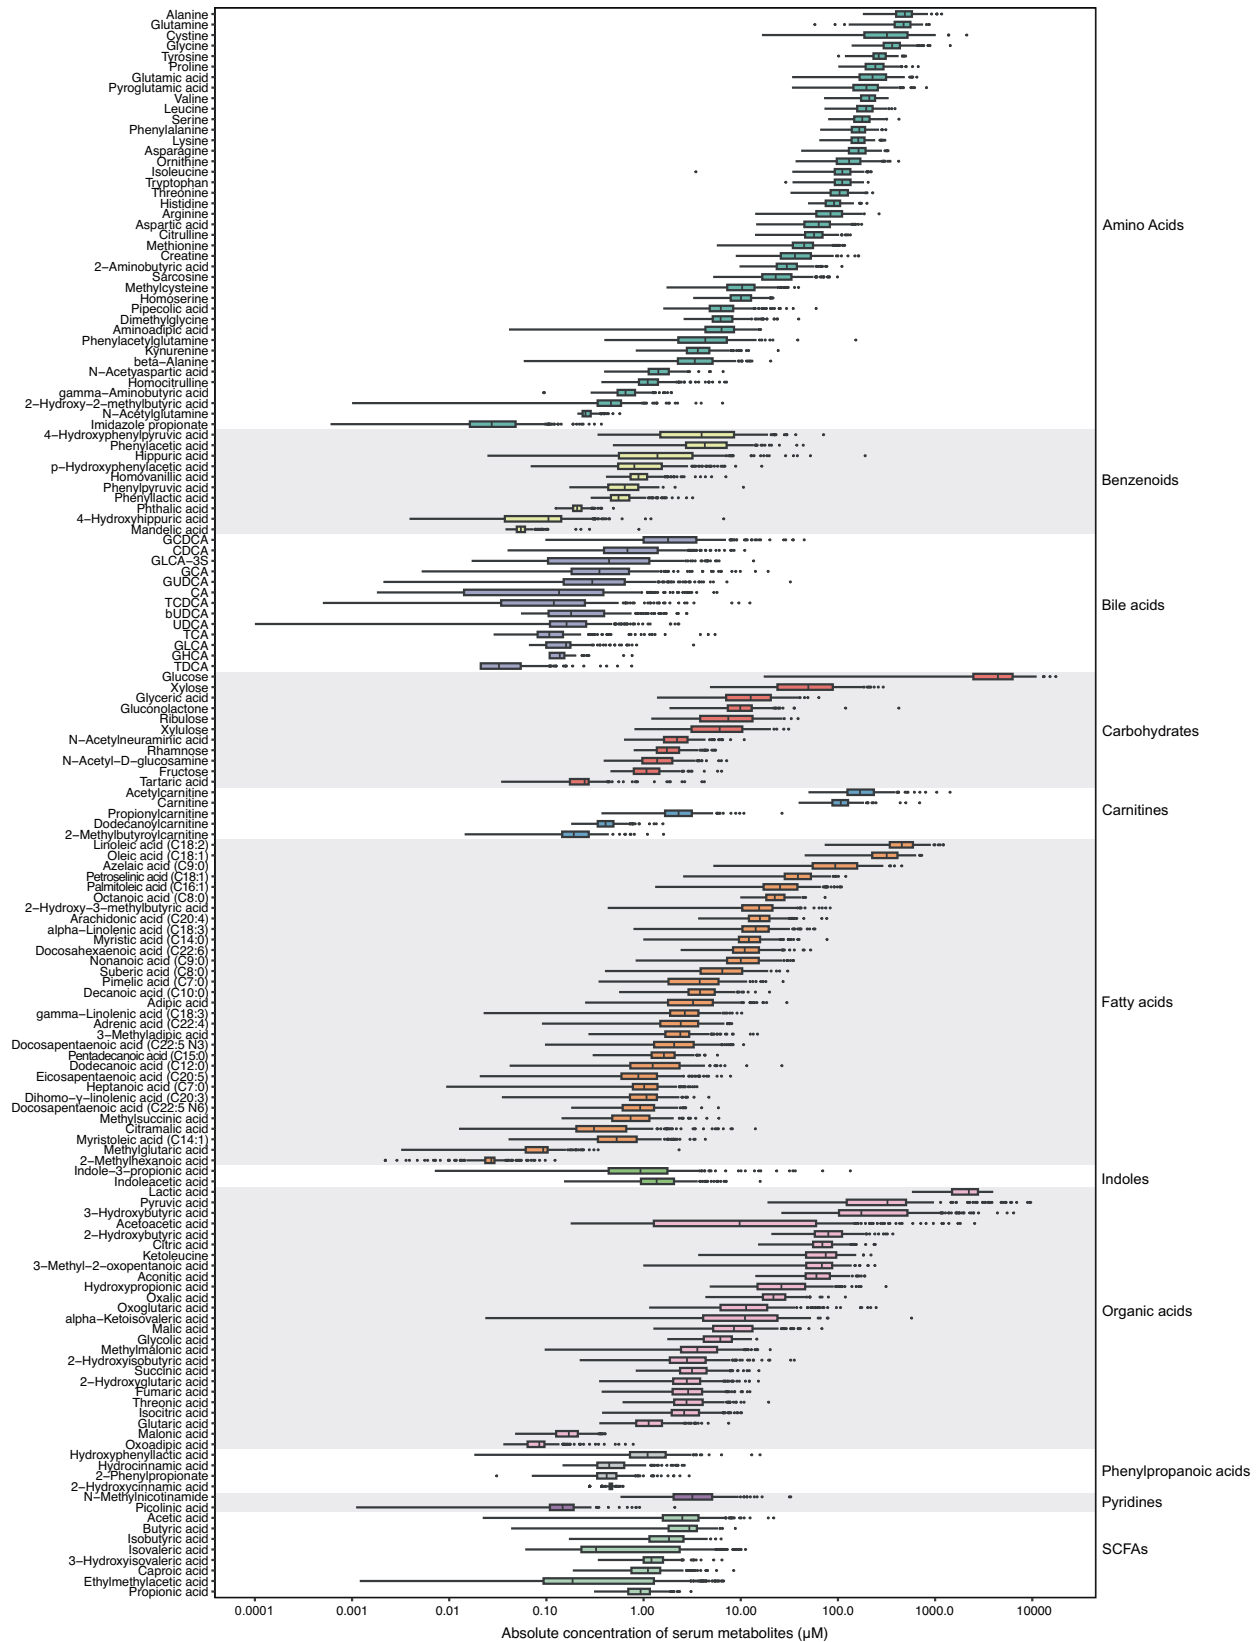

Figure EV2.

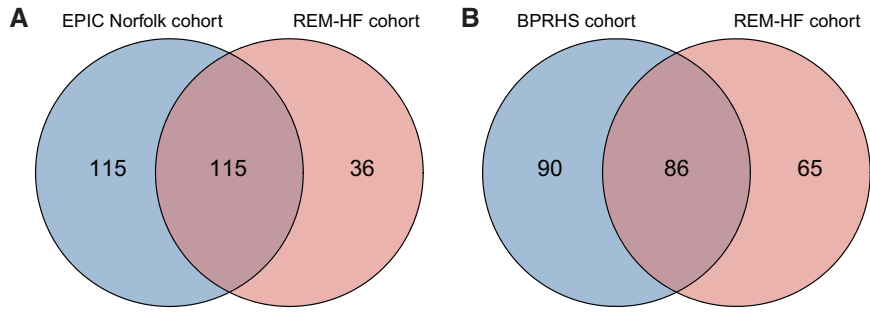

Number of microbilly associated metabolites overlapping between cohorts

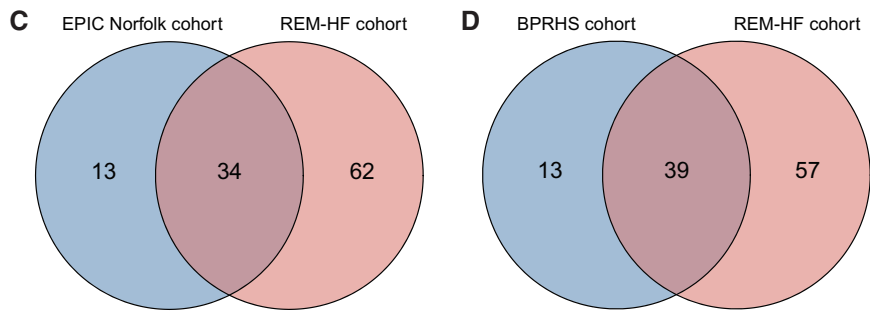

Number of microbilly associated metabolites that significantly altered in different cohorts

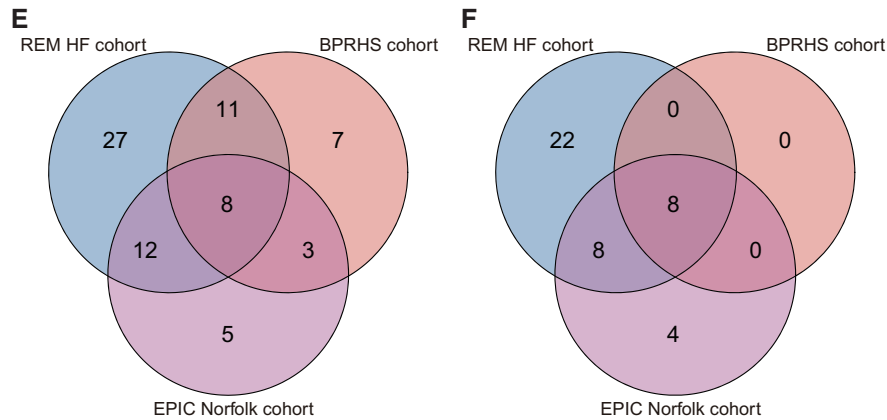

Number of metabolites with increased levels in cardiometabolic diseases versus the control

Number of metabolites with decreased levels in cardiometabolic diseases versus the control

**Figure EV3. Venn plots depicting numbers of shared metabolites across cohorts.**

A–F Numbers of metabolites (A) and significantly changed metabolites (C) that were overlapping between REM-HF and EPIC-Norfolk cohorts and similarly for those (B, D) between REM-HF and BPRHS cohorts. Numbers of increased (E) and decreased (F) metabolites across all three cohorts, respectively.

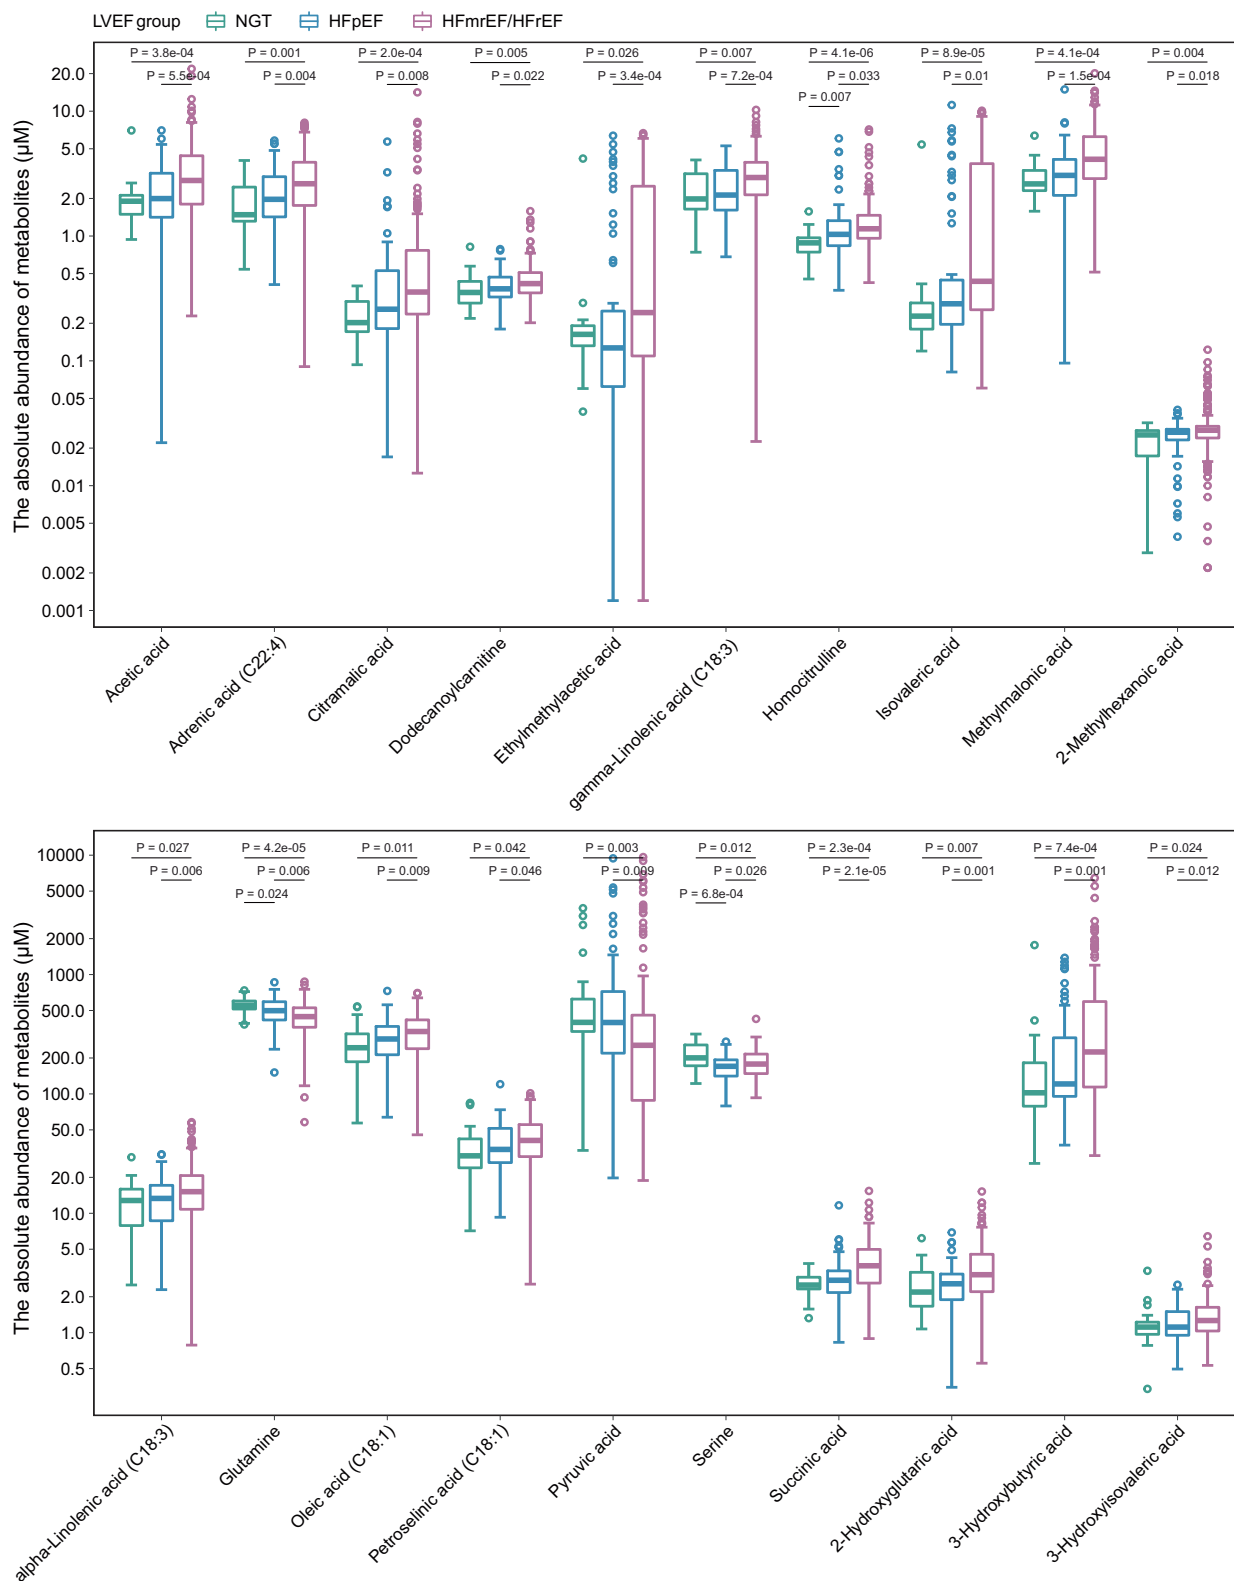

**Figure EV4. Metabolites that differed between different LVEF groups in REM-HF cohort.**

The central band in each box represents the median, the top, and bottom of the box the 25<sup>th</sup> and 75<sup>th</sup> percentiles, and the whiskers 1.5 times the interquartile range. NGT:  $n = 23$ , HFpEF: LVEF  $\geq 50$ ,  $n = 66$ ; HFmrEF:  $40 < \text{LVEF} < 50$ ,  $n = 68$ ; HFrEF: LVEF  $\leq 40$ ,  $n = 103$  (biological replicates).

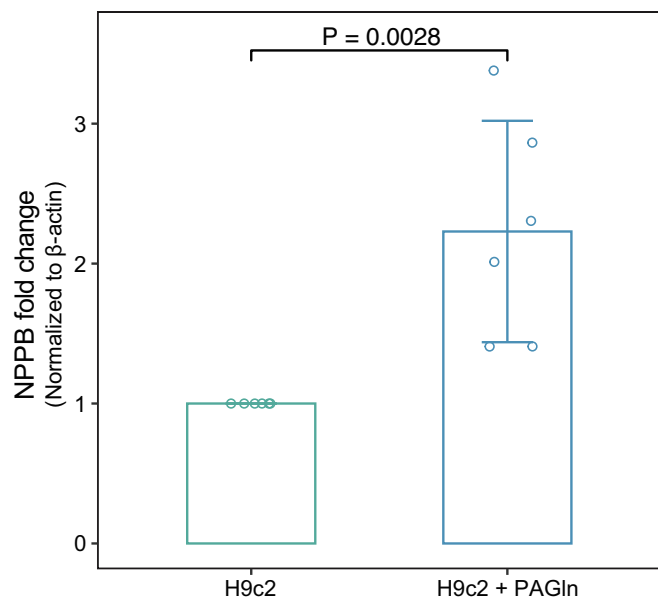

**Figure EV5. The relative expression of *NPPB* upon phenylacetylglutamine exposure.**

The relative expression of *NPPB* was detected by RT-PCR after 6-h exposure to 100 μM phenylacetylglutamine ( $n = 6$ , biological replicates). The data are shown as mean  $\pm$  s.d. Statistical analysis was performed by the Wilcoxon rank-sum test.
